# Supplementary material
Source: PubMed Central journal article supplement (PMC2782292)
Supplement: tpc.109.069179_1.pdf [file tpc.109.069179_1.pdf]

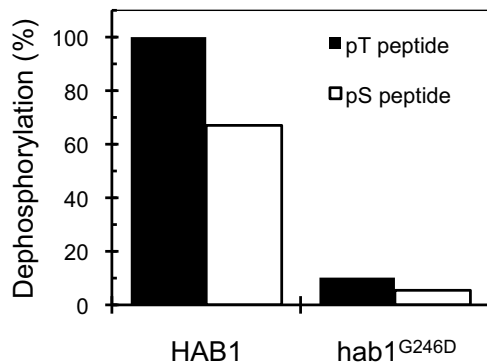

**Supplemental Figure 1. HAB1 and hab1<sup>G246D</sup> show a slight preference for phospho-Thr (pT).** HAB1 and hab1<sup>G246D</sup> phosphatase activity was measured as the speed of phosphate hydrolysis from degenerate peptides either phosphorylated on Thr (YAXXXXpTXXXAKKK, black bar) or on Ser (YAXXXXpSXXXAKKK, white bar). The data were normalized to the activity of HAB1 to the pT peptide.

| ABI1 | P    | G    | A    | C    | S     | T     | V    | I    | L    | M    | F    | Y    | W    | H    | K    | R    | N    | Q    | D    | E    |
|------|------|------|------|------|-------|-------|------|------|------|------|------|------|------|------|------|------|------|------|------|------|
| -5   | 1,39 | 1,09 | 1,09 | 0,75 | 1,04  | 1,04  | 0,62 | 0,62 | 0,62 | 0,62 | 0,83 | 0,83 | 0,80 | 1,11 | 1,15 | 1,15 | 1,06 | 1,06 | 1,15 | 1,15 |
| -4   | 1,38 | 1,25 | 1,25 | 0,43 | 1,15  | 1,15  | 0,70 | 0,70 | 0,70 | 0,70 | 0,73 | 0,73 | 0,51 | 1,14 | 1,08 | 1,08 | 1,22 | 1,22 | 1,41 | 1,41 |
| -3   | 1,27 | 1,21 | 1,21 | 0,68 | 1,13  | 1,13  | 0,70 | 0,70 | 0,70 | 0,70 | 0,88 | 0,88 | 0,67 | 1,16 | 0,88 | 0,88 | 1,38 | 1,38 | 1,05 | 1,05 |
| -2   | 1,10 | 1,12 | 1,12 | 1,09 | 1,15  | 1,15  | 0,76 | 0,76 | 0,76 | 0,76 | 0,93 | 0,93 | 0,92 | 0,93 | 0,85 | 0,85 | 1,14 | 1,14 | 1,01 | 1,01 |
| -1   | 1,61 | 0,89 | 0,89 | 0,76 | 1,08  | 1,08  | 0,62 | 0,62 | 0,62 | 0,62 | 0,71 | 0,71 | 0,47 | 1,17 | 1,25 | 1,25 | 1,27 | 1,27 | 1,18 | 1,18 |
| 0    | 0,00 | 0,00 | 0,00 | 0,00 | 11,00 | 11,00 | 0,00 | 0,00 | 0,00 | 0,00 | 0,00 | 0,00 | 0,00 | 0,00 | 0,00 | 0,00 | 0,00 | 0,00 | 0,00 | 0,00 |
| +1   | 0,00 | 1,35 | 1,35 | 1,32 | 1,30  | 1,30  | 1,60 | 1,60 | 1,60 | 1,60 | 1,60 | 1,60 | 0,84 | 0,76 | 1,03 | 1,03 | 0,92 | 0,92 | 0,27 | 0,27 |
| +2   | 0,71 | 1,38 | 1,38 | 1,00 | 1,24  | 1,24  | 1,12 | 1,12 | 1,12 | 1,12 | 0,87 | 0,87 | 0,89 | 0,93 | 0,65 | 0,65 | 1,28 | 1,28 | 0,94 | 0,94 |
| +3   | 1,39 | 1,13 | 1,13 | 0,74 | 0,99  | 0,99  | 0,88 | 0,88 | 0,88 | 0,88 | 0,84 | 0,84 | 0,80 | 1,08 | 0,91 | 0,91 | 1,20 | 1,20 | 1,04 | 1,04 |
| +4   | 1,20 | 1,15 | 1,15 | 0,87 | 1,07  | 1,07  | 1,06 | 1,06 | 1,06 | 1,06 | 0,96 | 0,96 | 0,97 | 1,02 | 0,77 | 0,77 | 0,90 | 0,90 | 1,03 | 1,03 |

| abi1 <sup>G180D</sup> | P    | G    | A    | C    | S     | T     | V    | I    | L    | M    | F    | Y    | W    | H    | K    | R    | N    | Q    | D    | E    |
|-----------------------|------|------|------|------|-------|-------|------|------|------|------|------|------|------|------|------|------|------|------|------|------|
| -5                    | 1,32 | 1,14 | 1,14 | 0,70 | 1,07  | 1,07  | 0,50 | 0,50 | 0,50 | 0,50 | 0,75 | 0,75 | 0,74 | 1,24 | 1,14 | 1,14 | 1,12 | 1,12 | 1,28 | 1,28 |
| -4                    | 1,21 | 1,06 | 1,06 | 0,64 | 1,11  | 1,11  | 0,69 | 0,69 | 0,69 | 0,69 | 0,68 | 0,68 | 0,53 | 1,11 | 1,07 | 1,07 | 1,27 | 1,27 | 1,63 | 1,63 |
| -3                    | 1,34 | 1,32 | 1,32 | 0,63 | 1,09  | 1,09  | 0,60 | 0,60 | 0,60 | 0,60 | 0,83 | 0,83 | 0,70 | 1,18 | 0,74 | 0,74 | 1,50 | 1,50 | 1,07 | 1,07 |
| -2                    | 1,07 | 1,18 | 1,18 | 0,79 | 1,10  | 1,10  | 0,73 | 0,73 | 0,73 | 0,73 | 0,75 | 0,75 | 0,83 | 1,17 | 0,96 | 0,96 | 1,31 | 1,31 | 1,11 | 1,11 |
| -1                    | 1,70 | 1,44 | 1,44 | 0,66 | 1,13  | 1,13  | 0,44 | 0,44 | 0,44 | 0,44 | 0,65 | 0,65 | 0,48 | 1,00 | 1,22 | 1,22 | 1,04 | 1,04 | 1,24 | 1,24 |
| 0                     | 0,00 | 0,00 | 0,00 | 0,00 | 11,00 | 11,00 | 0,00 | 0,00 | 0,00 | 0,00 | 0,00 | 0,00 | 0,00 | 0,00 | 0,00 | 0,00 | 0,00 | 0,00 | 0,00 | 0,00 |
| +1                    | 0,00 | 1,20 | 1,20 | 1,61 | 2,01  | 2,01  | 1,82 | 1,82 | 1,82 | 1,82 | 1,54 | 1,54 | 0,28 | 0,97 | 1,00 | 1,00 | 0,54 | 0,54 | 0,02 | 0,02 |
| +2                    | 0,58 | 0,94 | 0,94 | 1,30 | 0,91  | 0,91  | 1,42 | 1,42 | 1,42 | 1,42 | 1,06 | 1,06 | 0,92 | 0,90 | 0,57 | 0,57 | 1,52 | 1,52 | 0,89 | 0,89 |
| +3                    | 1,58 | 1,09 | 1,09 | 0,74 | 0,97  | 0,97  | 0,70 | 0,70 | 0,70 | 0,70 | 0,81 | 0,81 | 0,69 | 1,12 | 1,17 | 1,17 | 1,25 | 1,25 | 0,88 | 0,88 |
| +4                    | 1,24 | 1,18 | 1,18 | 0,73 | 1,06  | 1,06  | 1,06 | 1,06 | 1,06 | 1,06 | 0,95 | 0,95 | 1,05 | 0,85 | 0,89 | 0,89 | 0,94 | 0,94 | 1,05 | 1,05 |

| ABI2 | P    | G    | A    | C    | S     | T     | V    | I    | L    | M    | F    | Y    | W    | H    | K    | R    | N    | Q    | D    | E    |
|------|------|------|------|------|-------|-------|------|------|------|------|------|------|------|------|------|------|------|------|------|------|
| -5   | 1,51 | 1,20 | 1,20 | 0,77 | 1,15  | 1,15  | 0,48 | 0,48 | 0,48 | 0,48 | 0,77 | 0,77 | 0,69 | 1,12 | 1,10 | 1,10 | 0,95 | 0,95 | 1,26 | 1,26 |
| -4   | 1,34 | 1,19 | 1,19 | 0,58 | 1,00  | 1,00  | 0,54 | 0,54 | 0,54 | 0,54 | 0,56 | 0,56 | 0,50 | 1,19 | 1,17 | 1,17 | 1,25 | 1,25 | 1,68 | 1,68 |
| -3   | 1,18 | 1,32 | 1,32 | 0,53 | 1,17  | 1,17  | 0,44 | 0,44 | 0,44 | 0,44 | 0,63 | 0,63 | 0,63 | 1,29 | 1,01 | 1,01 | 1,46 | 1,46 | 1,33 | 1,33 |
| -2   | 1,28 | 1,43 | 1,43 | 0,79 | 0,99  | 0,99  | 0,55 | 0,55 | 0,55 | 0,55 | 0,70 | 0,70 | 0,75 | 0,84 | 0,96 | 0,96 | 1,36 | 1,36 | 1,37 | 1,37 |
| -1   | 1,50 | 1,39 | 1,39 | 0,75 | 1,01  | 1,01  | 0,42 | 0,42 | 0,42 | 0,42 | 0,58 | 0,58 | 0,43 | 1,24 | 1,20 | 1,20 | 1,15 | 1,15 | 1,34 | 1,34 |
| 0    | 0,00 | 0,00 | 0,00 | 0,00 | 11,00 | 11,00 | 0,00 | 0,00 | 0,00 | 0,00 | 0,00 | 0,00 | 0,00 | 0,00 | 0,00 | 0,00 | 0,00 | 0,00 | 0,00 | 0,00 |
| +1   | 0,00 | 1,50 | 1,50 | 1,48 | 1,47  | 1,47  | 1,17 | 1,17 | 1,17 | 1,17 | 1,40 | 1,40 | 0,67 | 0,90 | 1,09 | 1,09 | 0,94 | 0,94 | 0,38 | 0,38 |
| +2   | 0,76 | 1,12 | 1,12 | 1,14 | 0,91  | 0,91  | 1,02 | 1,02 | 1,02 | 1,02 | 1,06 | 1,06 | 0,78 | 0,83 | 0,62 | 0,62 | 1,44 | 1,44 | 1,32 | 1,32 |
| +3   | 1,50 | 1,12 | 1,12 | 0,94 | 1,00  | 1,00  | 0,63 | 0,63 | 0,63 | 0,63 | 0,77 | 0,77 | 0,69 | 1,09 | 0,67 | 0,67 | 1,18 | 1,18 | 1,40 | 1,40 |
| +4   | 1,38 | 1,19 | 1,19 | 1,02 | 0,92  | 0,92  | 0,81 | 0,81 | 0,81 | 0,81 | 0,74 | 0,74 | 0,86 | 1,00 | 0,68 | 0,68 | 1,06 | 1,06 | 1,34 | 1,34 |

| abi2 <sup>G168D</sup> | P    | G    | A    | C    | S     | T     | V    | I    | L    | M    | F    | Y    | W    | H    | K    | R    | N    | Q    | D    | E    |
|-----------------------|------|------|------|------|-------|-------|------|------|------|------|------|------|------|------|------|------|------|------|------|------|
| -5                    | 1,36 | 1,10 | 1,10 | 0,99 | 1,12  | 1,12  | 0,62 | 0,62 | 0,62 | 0,62 | 0,87 | 0,87 | 0,80 | 1,05 | 0,95 | 0,95 | 0,84 | 0,84 | 1,30 | 1,30 |
| -4                    | 1,21 | 0,96 | 0,96 | 0,63 | 1,09  | 1,09  | 0,59 | 0,59 | 0,59 | 0,59 | 0,60 | 0,60 | 0,55 | 1,08 | 1,06 | 1,06 | 1,28 | 1,28 | 1,96 | 1,96 |
| -3                    | 0,95 | 1,31 | 1,31 | 0,72 | 1,09  | 1,09  | 0,39 | 0,39 | 0,39 | 0,39 | 0,81 | 0,81 | 0,77 | 0,93 | 0,83 | 0,83 | 1,73 | 1,73 | 1,47 | 1,47 |
| -2                    | 0,96 | 1,34 | 1,34 | 0,86 | 0,82  | 0,82  | 0,66 | 0,66 | 0,66 | 0,66 | 0,74 | 0,74 | 0,75 | 1,21 | 0,77 | 0,77 | 1,42 | 1,42 | 1,45 | 1,45 |
| -1                    | 1,38 | 1,24 | 1,24 | 0,79 | 1,04  | 1,04  | 0,36 | 0,36 | 0,36 | 0,36 | 0,71 | 0,71 | 0,50 | 1,15 | 1,32 | 1,32 | 1,33 | 1,33 | 1,18 | 1,18 |
| 0                     | 0,00 | 0,00 | 0,00 | 0,00 | 11,00 | 11,00 | 0,00 | 0,00 | 0,00 | 0,00 | 0,00 | 0,00 | 0,00 | 0,00 | 0,00 | 0,00 | 0,00 | 0,00 | 0,00 | 0,00 |
| +1                    | 0,00 | 1,25 | 1,25 | 1,67 | 1,97  | 1,97  | 1,77 | 1,77 | 1,77 | 1,77 | 1,66 | 1,66 | 0,13 | 0,97 | 1,10 | 1,10 | 0,47 | 0,47 | 0,01 | 0,01 |
| +2                    | 0,69 | 0,96 | 0,96 | 1,44 | 0,68  | 0,68  | 1,41 | 1,41 | 1,41 | 1,41 | 1,14 | 1,14 | 0,85 | 0,86 | 0,57 | 0,57 | 1,49 | 1,49 | 0,90 | 0,90 |
| +3                    | 1,20 | 1,16 | 1,16 | 0,77 | 1,06  | 1,06  | 0,61 | 0,61 | 0,61 | 0,61 | 0,72 | 0,72 | 0,66 | 1,38 | 1,17 | 1,17 | 1,14 | 1,14 | 1,15 | 1,15 |
| +4                    | 1,55 | 1,45 | 1,45 | 0,98 | 0,73  | 0,73  | 0,85 | 0,85 | 0,85 | 0,85 | 1,01 | 1,01 | 1,00 | 0,97 | 0,81 | 0,81 | 0,64 | 0,64 | 1,02 | 1,02 |

**Supplemental Figure 2. Position-Specific Scoring Matrix (PSSM) of ABI1, abi1<sup>G180D</sup>, ABI2 and abi2<sup>G168D</sup>.** The weight (w) of each amino acid at each position reported in the PSSM corresponds to the ratio between the speed of dephosphorylation of the corresponding peptide and the mean speed of peptide dephosphorylation at a given position. Weights were colored from blue ( $1 < w \leq 2.5$  and over) to red ( $1 > w \geq 0.2$  and under) using Excel conditional formatting.

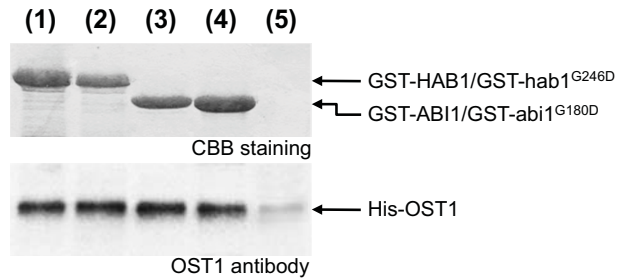

**Supplemental Figure 3. OST1 interacts with HAB1 and ABI1 *in vitro*.** GST-HAB1 (1), GST-hab1<sup>G246D</sup> (2), GST-ABI1 (3), GST-abi1<sup>G180D</sup> (4), GST (5) proteins (upper panel, GST is not visible because of its lower size) were bounded to glutathione-sepharose beads and incubated with His-OST1 for 2 h at 20°C in binding buffer (20 mM Tris-HCl pH 8, 100 mM NaCl, 1 mM EDTA, 1 mM DTT). After thorough washing with the binding buffer, His-OST1 attached to the beads was detected by immunoblotting using the anti-OST1 antibody.

**A**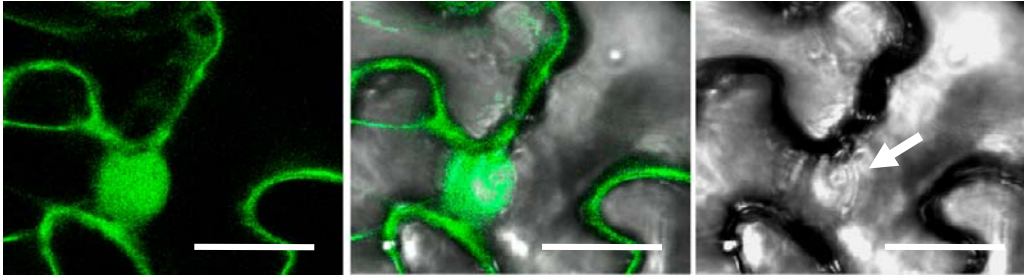**B**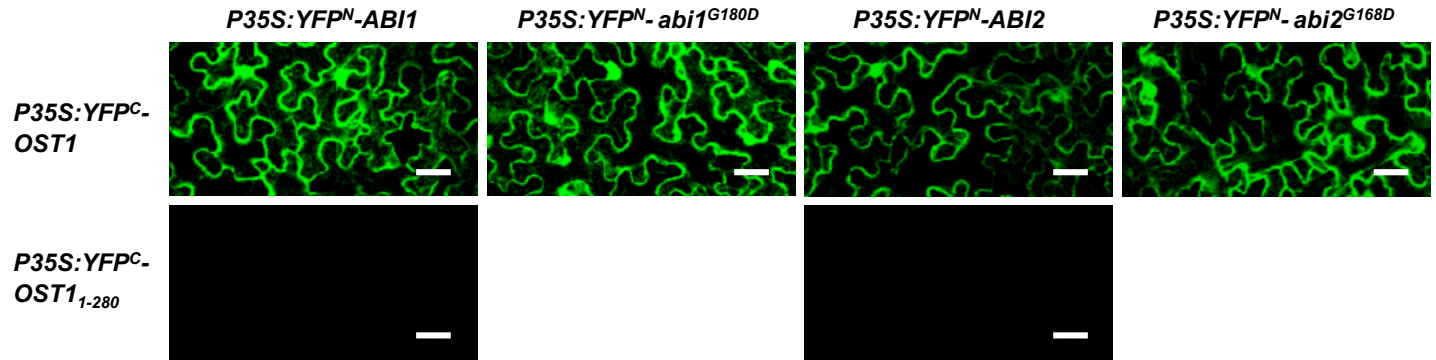**C**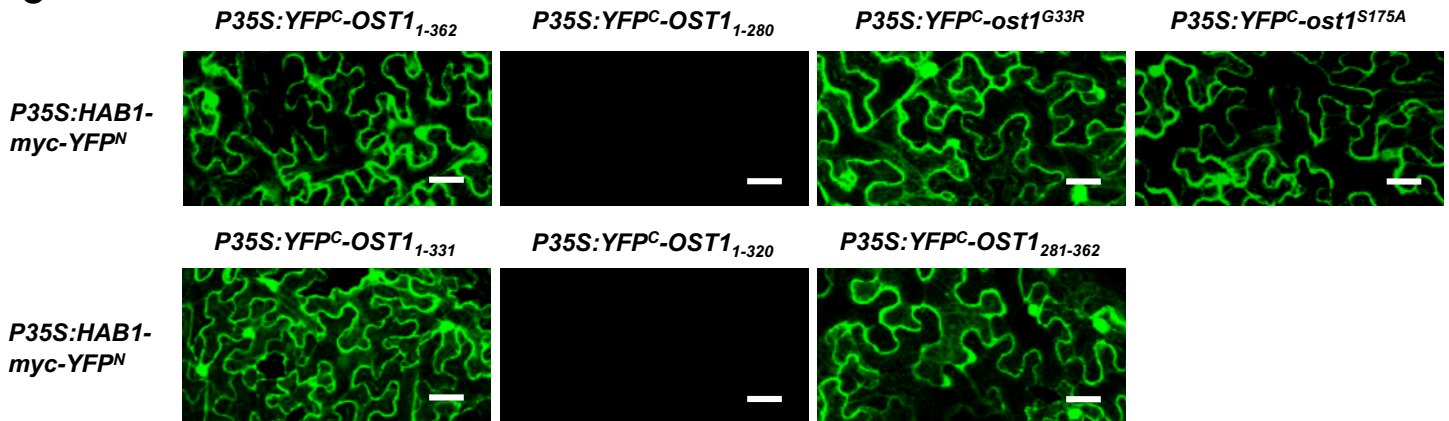

**Supplemental Figure 4. Wild-type and G to D mutant PP2Cs interact with OST1 in plant cells.** (A) The YFP fluorescent signal (left panel) resulting from the interaction between HAB1-myc-YFP<sup>N</sup> and YFP<sup>C</sup>-OST1 is visible at the periphery of epidermal cells and in spherical structures, in regions corresponding to nuclei visible in the bright field microphotograph. Scale bars correspond to 25 μm. (B) Larger views of the BiFC fluorescent images presented in Figures 4D showing the interaction of OST1 with the PP2C ABI1 and ABI2 and their G to D mutant forms. Scale bars correspond to 25 μm. (C) Larger views of the BiFC fluorescent images presented in Figures 5A showing the interaction between HAB1 and different OST1 mutant and deletion forms. Scale bars correspond to 25 μm.
